# Supplementary material for: A Modular BAM Complex in the Outer Membrane of the α-Proteobacterium Caulobacter crescentus
Source: PubMed Central journal article supplement (PMC2797634; doi:10.1371/journal.pone.0008619), 2010-01-08
Supplement: pone.0008619.s001.pdf [file pone.0008619.s001.pdf]

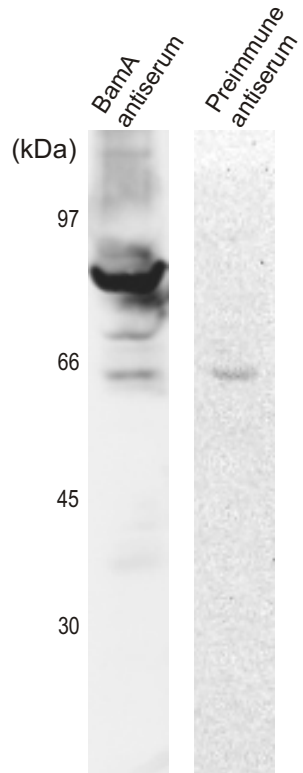

**Supplementary Figure S1:** Immunoblot of *Caulobacter* cell lysate probed with BamA antisera and pre-immunisation bleed.
